1 **Structural imaging of native cryo-preserved secondary cell walls**  
2 **reveals presence of microfibrils composed of cellulose, lignin and**  
3 **xylan.**

4 Jan J. Lyczakowski<sup>1,2</sup>, Matthieu Bourdon<sup>3</sup>, Oliver M. Terrett<sup>1</sup>, Ykä Helariutta<sup>3,4</sup>,  
5 Raymond Wightman<sup>3,#</sup> and Paul Dupree<sup>1,2,#</sup>

6

7 <sup>1</sup> Department of Biochemistry, University of Cambridge, Tennis Court Road,  
8 Cambridge, CB2 1QW, UK

9 <sup>2</sup> Natural Material Innovation Centre, University of Cambridge, 1 Scroope Terrace,  
10 Cambridge, CB2 1PX, UK

11 <sup>3</sup> The Sainsbury Laboratory, University of Cambridge, Bateman Street, Cambridge,  
12 CB2 1LR, UK

13 <sup>4</sup> Institute of Biotechnology/Department of Biological and Environmental Sciences,  
14 University of Helsinki, FIN-00014, Finland

15

16 # Address correspondence to Raymond Wightman

17 ([raymond.wightman@slcu.cam.ac.uk](mailto:raymond.wightman@slcu.cam.ac.uk)) or Paul Dupree ([pd101@cam.ac.uk](mailto:pd101@cam.ac.uk)).

18

19

20

21

22

23

24

25

26

27 **Abstract:**

28 The woody secondary cell walls of plants are the largest repository of renewable  
29 carbon biopolymers on the planet. These walls are made principally from cellulose and  
30 hemicelluloses and are impregnated with lignin. Despite their importance as the main  
31 load bearing structure for plant growth, as well as their industrial importance as both a  
32 material and energy source, the precise arrangement of these constituents within the  
33 cell wall is not yet fully understood. We have adapted low temperature scanning  
34 electron microscopy (cryo-SEM) for imaging the nanoscale architecture of angiosperm  
35 and gymnosperm cell walls in their native hydrated state. Our work confirms that cell  
36 wall microfibrils, cylindrical structures with a diameter exceeding 10 nm, are a  
37 common feature of the native hardwood and softwood samples. We have observed  
38 these same structures in *Arabidopsis thaliana* secondary cell walls, enabling  
39 microfibrils to be compared between mutant lines that are perturbed in cellulose,  
40 hemicellulose and lignin formation. Our analysis indicates that the microfibrils in  
41 *Arabidopsis* cell walls are composed, at least partially, of cellulose, xylan and lignin.  
42 This study is a useful additional approach for investigating the native nanoscale  
43 architecture and composition of hardwood and softwood secondary cell walls and  
44 demonstrates the applicability of *Arabidopsis* genetic resources to relate fibril structure  
45 with wall composition and biosynthesis.

46 Keywords: SEM, cell walls, microfibrils, cellulose, xylan, lignin, softwood, hardwood,  
47 *Arabidopsis thaliana*

48

49 **Introduction:**

50 The majority of carbon in terrestrial biomass is stored in forests as wood (Ramage et  
51 al., 2017, Pan et al., 2011). The current classification system distinguishes two types  
52 of timber. Wood from Angiosperm trees is known as hardwood and the wood made by  
53 Gymnosperm species is described as softwood (Ramage et al., 2017). Despite  
54 significant differences in tissue organisation and chemical composition, both these  
55 types of timber are almost entirely formed from plant secondary cell walls – an  
56 extracellular matrix made primarily from cellulose, lignin and hemicelluloses  
57 (Schweingruber, 2007). Considering the ecological and industrial importance of wood  
58 and other cell wall materials, our knowledge of the exact arrangement of these  
59 polymers in the cell wall remains poor. A better understanding of the molecular

60 architecture and ultrastructure of cell walls is needed to describe the complex  
61 spatiotemporal deposition pattern of the cell wall polymers. This may contribute to the  
62 development of more efficient biofuel feedstocks (Loque et al., 2015), to the  
63 improvement in our understanding of novel biomaterials such as nanocellulose (Jarvis,  
64 2018), and to applications such as advanced approaches for the use of timber in the  
65 construction industry (Ramage et al., 2017)

66 Cellulose is the main constituent of plant cell walls (Pauly and Keegstra, 2008). At the  
67 molecular level, cellulose has a simple repeating structure of  $\beta$ -1,4-linked  
68 glucopyranosyl residues. These glucan chains coalesce to form a crystalline cellulose  
69 microfibril. The exact structure of the microfibril is unknown, however, it has been  
70 suggested the elementary microfibril consists of 18 or 24 individual glucan chains  
71 (Gonneau et al., 2014, Hill et al., 2014, Turner and Kumar, 2017). Individual cellulose  
72 microfibrils associate to form larger order structures known as macrofibrils (Niklas,  
73 2004). In plant primary cell walls this close-contact association may be limited to  
74 selected parts of microfibril which is proposed to lead to formation of so-called  
75 biomechanical hotspots (Cosgrove, 2014). A range of imaging and spectroscopic  
76 techniques has been used to investigate cellulose macrofibrils in secondary cell walls,  
77 as reviewed by (Purbasha et al., 2009), but due to technical challenges the precise  
78 structure in native, unprocessed, hydrated secondary cell walls remains poorly  
79 described. Lignin is the main non-polysaccharide component of both hardwood and  
80 softwood and is made by coupling of monolignol radicals in secondary cell walls. Three  
81 main monolignols exist in plants, which, once turned into chemical radicals by the  
82 activity of laccases and peroxidases, can couple in a random manner to form a lignin  
83 polymer made from guaiacyl (G), syringyl (S), and p-hydroxyphenyl (H) units (Ralph et  
84 al., 2004). The monolignol composition of hardwood and softwood differs, with the  
85 former consisting of predominantly S and G units and the latter being made almost  
86 solely from G units (Vanholme et al., 2010). The process of lignification is important  
87 for wood mechanical properties. Arabidopsis mutant plants with reduced lignin content  
88 or altered monolignol composition often have collapsed xylem vessels and can be  
89 severely dwarfed (Bonawitz and Chapple, 2010). Lignin is proposed to associate with  
90 cell wall polysaccharides to form the recalcitrant matrix (Terrett and Dupree, 2019).

91 Xylan and galactoglucomannan are the principal hemicelluloses in hardwood and  
92 softwood. Xylan is a polymer of  $\beta$ -1,4-linked xylopyranosyl residues and is the main  
93 hemicellulose in hardwood but is also present in softwood (Scheller and Ulvskov,  
94 2010). Hardwood and softwood xylans carry  $\alpha$ -1–2 linked glucuronic acid (GlcA)  
95 branches which can be methylated on carbon 4 leading to formation of 4-O-  
96 Methylglucuronic acid (MeGlcA) (Scheller and Ulvskov, 2010). In addition to GlcA and  
97 Me GlcA (together, [Me]GlcA) decorations, hardwood xylan hydroxyls are acetylated  
98 on carbon 2, carbon 3 or both carbons of the monomer. The softwood xylan, in addition  
99 to the MeGlcA branches, carries  $\alpha$ -1,3–linked arabinofuranosyl decorations (Scheller  
100 and Ulvskov, 2010, Busse-Wicher et al., 2016b). The presence of [Me]GlcA branches  
101 on xylan is important for the maintenance of biomass recalcitrance (Lyczakowski et  
102 al., 2017) and, together with acetylation in hardwood and arabinose decorations in  
103 softwood, these substitutions are mostly distributed with an even pattern on xylosyl  
104 units (Bromley et al., 2013, Busse-Wicher et al., 2014, Busse-Wicher et al., 2016b,  
105 Martinez-Abad et al., 2017). This so-called ‘compatible’ patterning of xylan  
106 substitutions is thought to allow the hydrogen bonding between xylan, in a two-fold  
107 screw conformation, and the hydrophilic surface of the cellulose microfibril  
108 (BusseWicher et al., 2016a, Simmons et al., 2016, Grantham et al., 2017).  
109 Galactoglucomannan (GGM) is the main hemicellulose in softwood (Scheller and  
110 Ulvskov, 2010) but is also present in hardwood xylem. GGM has a backbone formed  
111 from both  $\beta$ -1,4-linked mannosyl and glucosyl residues with some mannosyl residues  
112 substituted by an  $\alpha$ -1,6-linked galactosyl branch. The GGM backbone can also be  
113 acetylated. The arrangement of mannose and glucose units in softwood GGM is  
114 thought to be random, but a recently described regular structure GGM found in  
115 *Arabidopsis mucilage* was proposed to bind to both the hydrophilic and hydrophobic  
116 surface of the cellulose microfibril (Yu et al., 2018). *In vitro* studies using TEM and 1D  
117  $^{13}\text{C}$  NMR indicate that a range of branched and unbranched mannan and glucomannan  
118 structures can interact with bacterial cellulose (Whitney et al., 1998). Softwood GGM  
119 is also proposed to interact with the cellulose microfibril (Terashima et al., 2009) and  
120 recent evidence demonstrates that it can form covalent linkages with lignin (Nishimura  
121 et al., 2018).

122 Although we now have a better understanding of secondary cell wall composition and  
123 the nature of the interactions between its main constituents, a picture of the

124 ultrastructural assembly of wall polymers into a secondary cell wall matrix is not yet  
125 complete. Solid state NMR (ssNMR) analysis has been applied extensively to the  
126 study of polymer interactions in both primary and secondary walls. This, for example,  
127 provided evidence that in dried primary wall samples from Arabidopsis, pectin and  
128 xyloglucan may be interacting with the cellulose microfibril (Dick-Perez et al., 2011).  
129 Analysis of hydrated secondary cell wall of Arabidopsis with solid state NMR indicated  
130 that xylan is likely to interact with the hydrophilic surface of the cellulose microfibril as  
131 a two-fold screw (Simmons et al., 2016, Grantham et al., 2017). Recent ssNMR  
132 analysis indicates that in dried cell walls of grasses xylan is likely to interact with lignin  
133 (Kang et al., 2019). Despite providing excellent insights into the proximity of different  
134 cell wall components ssNMR cannot provide information about the assembly of these  
135 constituents into higher order structures. Some insights into this process have been  
136 achieved with other techniques. This includes application of vibrational  
137 microspectroscopy techniques such as FT-IR and RAMAN to study the orientation of  
138 cellulose and other cell wall components in the matrix, as reviewed by (Gierlinger,  
139 2018). AFM has been applied to the study of cell wall matrix assembly, but the work  
140 has been focused on primary cell walls (Cosgrove, 2014) and only recent advances  
141 allowed nanoscale resolution imaging of dried spruce secondary cell walls (Casdorff  
142 et al., 2017). Moreover, insights into the assembly of cellulose microfibrils in wood  
143 walls of conifers (Fernandes et al., 2011) and dicots (Thomas et al., 2014) have been  
144 obtained using wide-angle X-ray scattering (WAXS) and small-angle neutron  
145 scattering (SANS).

146 In addition to these various approaches, other studies have attempted to use scanning  
147 electron microscopy (SEM) to study the structure of plant cell walls. Low temperature  
148 SEM (cryo-SEM), in which the sample is rapidly frozen and then maintained cold  
149 during imaging, has been used to study the collapse of pine needle tracheid cell walls  
150 upon prior dehydration (Cochard et al., 2004) and to visualise the bulging of root hairs  
151 in the *kojak* (cellulose synthase-like) mutant (Favery et al., 2001). Additionally, higher  
152 magnification cryo-SEM has been used to visualise cell walls of wheat awns (Elbaum  
153 et al., 2008). Some awn cell walls exhibit structural differences that are dependent  
154 upon the level of hydration and cryo-SEM revealed extensive layering within the wall,  
155 however, the technique was not further optimised to investigate individual fibrils. Field  
156 emission (FE) SEM techniques were effectively used to study the alignment of

157 cellulose microfibrils in *Arabidopsis* hypocotyls (Refregier et al., 2004), roots  
158 (Himmelspach et al., 2003) and stems (Fujita et al., 2013). FE-SEM has also been  
159 applied to investigate wood structure, including observations of microfibril alignment in  
160 fixed cell walls of fir tracheids (Abe et al., 1997) and lignin distribution in spruce  
161 tracheids (Fromm et al., 2003). Importantly, FE-SEM analysis of dehydrated pine and  
162 poplar wood suggests that secondary cell walls of these species contain macrofibrils  
163 – cylindrical fibrillar structures with a diameter of up to 60 nm, which presumably  
164 comprise of bundles of elementary cellulose microfibrils (Donaldson, 2007). Moreover,  
165 the diameter of these macrofibrils was observed to increase with increasing  
166 lignification, suggesting that the macrofibrils may be formed from association of lignin  
167 and cell wall polysaccharides. This analysis was extended further to wood from Ginkgo  
168 where the FE-SEM was combined with density analysis to propose a model of  
169 macrofibril formation based on cellulose, GGM, xylan and lignin interaction (Terashima  
170 et al., 2009).

171 It has been suggested that some of the treatments used in preparation of the FE-SEM  
172 cell wall samples have little impact on the microfibril alignment and that the technique  
173 may provide a true representation of native (unprocessed) cell wall features (Marga et  
174 al., 2005). The FE-SEM techniques applied to secondary cell wall samples, however,  
175 included additional steps such as (i) fixation and exposure to organic solvents (ii) a  
176 thermal treatment that may result in some degree of wall degradation (Fromm et al.,  
177 2003) and (iii) a thick coating of heavy metal which may impact upon the resolution  
178 (Donaldson, 2007), raising questions about the effect these may have on interpretation  
179 of the wall structure. Visualisation of native, hydrated, secondary cell walls with  
180 environmental FE-SEM has been challenging and the resolution of obtained images  
181 has been low (Donaldson, 2007). We present here a technique for the analysis of  
182 native, fully-hydrated, secondary cell wall material from angiosperm and gymnosperm  
183 plant species using cryo-SEM. The use of an ultrathin 3 nm platinum film, together with  
184 cryo-preservation at high vacuum, enabled us to demonstrate that cell wall macrofibrils  
185 are a common feature in all types of native secondary cell wall material analysed.  
186 Importantly, we were able to detect the presence of macrofibrils in *Arabidopsis thaliana*  
187 vessel secondary cell walls. This allowed us to make use of the readily available cell  
188 wall-related genetic resources, revealing *Arabidopsis* macrofibril diameter to be  
189 dependent upon cellulose, xylan and lignin.

190

191 **Results:**

192 *Softwood and hardwood secondary cell walls contain microfibrils*

193 In order to investigate and compare the nanoscale architecture of gymnosperm and  
194 angiosperm cell walls we analysed stem sections taken from spruce, Ginkgo and  
195 poplar using cryo-SEM. Stems were placed in the SEM specimen stub and  
196 immediately frozen in nitrogen slush, fractured and then coated with platinum, before  
197 being passed in to the SEM chamber for imaging. Nitrogen slush is a suspension of  
198 solid nitrogen that enables high freezing rates, greatly reducing the Leidenfrost effect  
199 during plunge freezing and thus minimising structural damage (Sansinena et al.,  
200 2012). The fine grain size attributed to platinum sputtering allows small and densely  
201 packed objects to be resolved. This rapid sample preparation protocol serves to better  
202 maintain sample hydration levels and native structures for optimal EM imaging in a  
203 high vacuum environment.

204 We first investigated whether our cryo-SEM protocol gave comparable results to the  
205 previous FE-SEM analysis of both softwood and hardwood secondary cell walls  
206 (Donaldson, 2007). To examine if microfibrils are found in natively hydrated,  
207 nonpretreated cell walls, cryo-SEM imaging was performed on unprocessed, frozen  
208 softwood and hardwood samples. For observing gymnosperm cell wall architecture,  
209 we first prepared softwood samples from spruce and used a low magnification to see  
210 an overview of stem cross-section (Figure 1a) and tracheid structure (Figure 1b). The  
211 inner part of the stem cross section was composed of densely packed xylem tracheids,  
212 each surrounded by cell walls. To investigate the appearance of the secondary cell  
213 walls, higher magnification images of these parts of tracheid cells were acquired. This  
214 enabled us to observe that the tracheid cell walls contain fibrous structures which  
215 frequently assembled into larger aggregates (Figure 1c and 1d, red arrows). After a  
216 further increase in magnification, individual fibrils became resolvable (Figure 1e and  
217 1f) and their diameter was found to exceed the 3 nm diameter calculated for a single  
218 softwood elementary microfibril (Fernandes et al., 2011). Therefore the observed  
219 fibrils, if composed of cellulose, represent a higher order structure that fits the  
220 description of a “macrofibril” (Niklas, 2004, Donaldson, 2007). Similarly to spruce stem,  
221 sections from another gymnosperm, the Ginkgo, were also observed to contain

222 macrofibrils (Figure S3). These data show that, in line with previously reported SEM  
223 imaging of dried, processed plant material (Donaldson, 2007, Terashima et al., 2009),  
224 the native, hydrated cell walls of spruce and Ginkgo also contain macrofibrils.  
225 Therefore, these structures may contribute to the higher order assembly of native  
226 gymnosperm cell walls.

227 We extended the analysis to the model hardwood species, poplar. Vessels, a distinct  
228 cell type of hardwood xylem, were clearly visible using low magnification (Figure 2a  
229 and 2b). In addition to the vessels, xylem fibre cells were also observed (Figure 2b;  
230 red and yellow arrows for vessels and fibre cells respectively). For some cells we were  
231 able to observe spiral thickenings which were preserved during sample preparation  
232 and extended above the surface of the fracture plane (Figure 2b). We focused upon  
233 the vessel cell walls which showed clearly visible fibrous structures at a vessel-  
234 to-vessel boundary (Figure 2c). Analysis of vessel cell walls at a higher magnification  
235 revealed a clear presence of macrofibril structures, similar to those observed in spruce,  
236 in the poplar samples (Figure 2d and 2e). To investigate the dimensions of the  
237 macrofibrils we measured their diameter in poplar and spruce (Figure 2f). Our  
238 measurements are broadly similar to those reported in a previous study (Donaldson,  
239 2007). We carried out comparative analysis of macrofibril diameter between hardwood  
240 and softwood by measuring 150 individual macrofibrils in poplar, spruce and Ginkgo.  
241 While the diameter of spruce and Ginkgo macrofibrils was not significantly different  
242 (Figure S4), the diameter of macrofibrils in poplar secondary cell walls was significantly  
243 smaller than that of spruce macrofibrils (Figure 2f). Spruce and Ginkgo were grown in  
244 the field while poplar samples were obtained from in vitro grown plants. To control for  
245 this difference in growth conditions we also analysed samples from field grown poplar  
246 trees. There was no statistically significant difference in the macrofibril diameter  
247 between the two poplar samples (Figure S5). For both hardwood and softwood we  
248 observed variation in the macrofibril diameter. This may reflect biological differences  
249 or may be a result of technical challenges associated with macrofibril width  
250 measurement.

#### 251 *Arabidopsis* secondary cell walls macrofibrils contain a cellulose scaffold

252 To further evaluate the nanoscale architecture of plant cell walls and identify possible  
253 constituents of the cell wall macrofibrils, the high magnification cryo-SEM imaging was



254 used to analyse wild type (WT) Arabidopsis secondary cell walls (Figure 3). The initial  
255 analysis investigated the structure of WT xylem vessels (Figure 3a and 3b). Sets of  
256 vessel bundles were detected and, using higher magnification, fibrous structures  
257 similar to those observed in spruce and poplar were also visible in the fractured  
258 Arabidopsis material. The width of WT Arabidopsis macrofibrils was comparable to  
259 that of poplar macrofibrils but not spruce and suggests Arabidopsis macrofibrils could  
260 be used as a good structural model for hardwoods (Figure S4, S5). Despite the use of  
261 ultra-thin platinum coating, the use of SEM without the cryo-preservation steps did not  
262 allow us to observe the Arabidopsis macrofibrils with good resolution (Figure S6)  
263 highlighting the critical importance of sample cryo-preservation to resolve a native cell  
264 wall ultrastructure.

265 Based on the data available in the literature we hypothesized that the macrofibrils may  
266 be mostly composed of cellulose (Fahlen and Salmen, 2002, Donaldson, 2007). To  
267 investigate this, and to understand the nature of these macrofibrils further, we  
268 performed a comparative analysis between WT vessel cell walls (Figure 3c) and a  
269 commercially available fibrous cellulose standard (Figure 3d) extracted from cotton  
270 linters and consisting of 99% pure cellulose (Sczostak, 2009). In this experiment, clear  
271 individual fibrils with distinct bright termini were observed in both samples indicating  
272 that the vessel wall macrofibrils have a similar appearance to the cellulose fibrils  
273 present in this polysaccharide standard. To determine whether these macrofibrils are  
274 dependent upon the proper production of cellulose, the morphology of WT Arabidopsis  
275 vessel cell walls (Figure 3e and 3g) was compared to that of the *irx3* mutant (Figure 3f  
276 and 3h). IRX3 is one of three CESA proteins that make up the secondary wall cellulose  
277 synthase complex and *irx3* plants are almost completely devoid of cellulose in their  
278 secondary cell walls, but not primary cell walls (Taylor et al., 1999). As previously  
279 reported, *irx3* plants had collapsed vessels (Figure S7), since secondary cell wall  
280 cellulose contributes to vessel wall strength (Turner & Somerville, 1997). Interestingly,  
281 the *irx3* stems lacked the fibrous structures in their vessel secondary cell walls and, in  
282 contrast to WT, the *irx3* cell walls were formed from a largely amorphous matrix (Figure  
283 3f). It is likely that this matrix is composed of xylan and lignin, which can still be  
284 deposited in the secondary cell wall in the absence of IRX3 activity (Takenaka et al.,  
285 2018). Some structures resembling the macrofibrils were present in the primary cell

286 walls of *irx3* plants (Figure S7). Taken together, the data demonstrate macrofibril  
287 formation is dependent upon cellulose production.

288 *Reduction in cell wall xylan and lignin, but not in galactoglucomannan content*  
289 *decreases the dimensions of Arabidopsis macrofibrils*

290 To investigate the role of xylan in macrofibril formation, cryo-SEM was used to  
291 visualise the secondary walls from *irx9*, *irx10* and *esk1* Arabidopsis plants (Figure 4a,  
292 4b and 4c). IRX9 and IRX10 are required for proper xylan synthesis and mutations in  
293 the corresponding genes lead to cell wall weakening and collapse of xylem vessels in  
294 the Arabidopsis model (Brown et al., 2007, Bauer et al., 2006, Brown et al., 2005). The  
295 *irx9* plants have impaired xylan synthesis resulting in a decrease of xylan by more than  
296 50% compared to WT (Brown et al., 2007). In *irx10* plants the reduction in xylan  
297 content is smaller and does not exceed 20% (Brown et al., 2005). Macrofibrils are  
298 clearly observed in *irx9* and *irx10* Arabidopsis (Figure 4a and 4b). However, the  
299 median macrofibril diameter between WT and *irx9* cell wall fibres showed a ~30%  
300 reduction in the xylan synthesis mutant (Figure 4g). The median macrofibril diameter  
301 of *irx10* plants was ~10% smaller than that of WT Arabidopsis (Figure 4g). Although  
302 there was a wide variation in macrofibril diameter within each genotype, the difference  
303 between the WT macrofibril diameter and the one quantified for the two mutants is  
304 statistically significant, suggesting that xylan is incorporated along with cellulose to  
305 generate the normal macrofibril size. To investigate the role of xylan-cellulose  
306 interaction in the macrofibril formation we assessed the macrofibril size in the *esk1*  
307 Arabidopsis mutant (Figure 4c). Mutation in the *ESK1* gene results in reduction of xylan  
308 acetylation, but not in a decrease in xylan quantity (Xiong et al., 2013), which leads to  
309 changes in xylan [Me]GlcA patterning and loss of interaction between xylan and the  
310 hydrophilic surface of the cellulose microfibril (Grantham et al., 2017). In line with the  
311 results observed for *irx9* and *irx10* plants the loss of xylan-cellulose interaction caused  
312 a reduction in the macrofibril diameter (Figure 4g).

313 Previous work in softwood suggested that lignin (Donaldson, 2007) and  
314 galactoglucomannan (GGM) (Terashima et al., 2009) may be involved in macrofibril  
315 formation. To investigate the role of these two cell wall components in the maintenance  
316 of macrofibril structure we performed imaging of *4cl1* (Figure 4d), *lac4* (Figure 4e) and  
317 *csla2/3/9* (Figure 4f) mutant Arabidopsis cell walls. Both 4CL1 and LAC4 are involved

318 in lignin biosynthesis and plants mutated in genes encoding these enzymes have a  
319 30% and 15% reduction in lignin content respectively (Li et al., 2015, Berthet et al.,  
320 2011). The median macrofibril diameter for both *4cl1* and *lac4* was significantly smaller  
321 than that calculated for WT (Figure 4g). Importantly, the extent of the reduction in  
322 macrofibril diameter was in line with the decrease in the lignin content observed for the  
323 two mutants, with *4cl1* macrofibrils being ~15% smaller than the WT ones and *lac4*  
324 macrofibrils having ~7% reduction in the median diameter. Proteins from the CSLA  
325 family are involved in the biosynthesis of a hemicellulose galactoglucomannan and  
326 mutations in *cs/a2/3/9* leads to nearly complete loss of stem GGM in the Arabidopsis  
327 model (Goubet et al., 2009). Our quantitative analysis indicates that the diameter of  
328 macrofibrils of *cs/a2/3/9* Arabidopsis was not significantly different to that of the WT  
329 plants (Figure 4g).

330

## 331 Discussion

332 The native nanoscale architecture of woody plant secondary cell walls remains poorly  
333 understood due to the challenges of keeping the sample hydrated, which is  
334 incompatible with some types of techniques. Studies analysing dehydrated and fixed  
335 plant cell wall samples with FE-SEM (Donaldson, 2007), together with other work  
336 which includes SANS experiments investigating spruce (Fernandes et al., 2011) and  
337 bamboo samples (Thomas et al., 2015), suggest there is a higher order arrangement  
338 of cellulose microfibrils in plant secondary cell walls. Our work reports the application  
339 of a cryo-SEM based analysis technique which, using exclusively samples that have  
340 not been dried, heated or chemically processed, indicates that secondary cell wall  
341 cellulose microfibrils are likely to come together to form larger macrofibril structures.

342 Our study strongly suggests that these structures, at least in the model plant species  
343 *Arabidopsis thaliana*, contain cellulose, xylan and lignin.

344 Previous studies investigated the presence and diameter of macrofibrils in dehydrated  
345 softwood samples (Donaldson, 2007). In line with results presented in our work,  
346 Donaldson did observe macrofibrils in cell walls of pine tracheids. Moreover, also in  
347 agreement with the results presented here (Figure S4), these softwood macrofibrils  
348 were larger than those seen in hardwoods. In softwood, in addition to various patterned

349 types of xylan (Busse-Wicher et al., 2016b, Martinez-Abad et al., 2017), most of which  
350 are likely to be compatible with binding to the hydrophilic surface of the cellulose fibril,  
351 the cell walls contain large quantities of acetylated GGM (Scheller and Ulvskov, 2010)  
352 which may contribute to macrofibril width. Indeed, gymnosperm GGM was proposed  
353 to interact with the cellulose microfibril in cell walls of Ginkgo (Terashima et al., 2009).  
354 Therefore, the significant difference in macrofibril diameter observed between  
355 hardwood and softwood samples may be due to the differences in the cell wall  
356 composition. Consequently, we hypothesize that in gymnosperms, GGM, along with  
357 xylan, may contribute to the macrofibril size in a way similar to what we observed for  
358 xylan in Arabidopsis macrofibrils. With an average diameter ranging between 20 and  
359 34 nm, the size of pine macrofibrils measured by Donaldson was somewhat smaller  
360 than that measured in spruce wood in the current work. However, these observations  
361 are not necessarily inconsistent. Donaldson dehydrated the wood samples prior to the  
362 SEM imaging. As the spacing between bundled softwood cellulose microfibrils,  
363 estimated to be equal to 3 nm by small angle neutron scattering, is sensitive to wood  
364 hydration levels (Fernandes et al., 2011), at least part of the difference in the  
365 macrofibril diameter might be due to the changes in the water content within the  
366 sample analysed with SEM. Interestingly, Donaldson reported that macrofibrils in dried  
367 poplar wood, depending on their position in cell wall, have an average diameter  
368 ranging from 14 to 18 nm, which is similar to what was measured for both poplar and  
369 Arabidopsis as a part of our study. This observation suggests that the softwood  
370 macrofibril size may be more sensitive to drying than the hardwood one. This in turn  
371 suggests that, in addition to compositional disparities, hydration could contribute to the  
372 differences in softwood and hardwood macrofibril characteristics. In addition to  
373 providing scientific insight, this result highlights that imaging of the cryopreserved  
374 secondary cell walls offers significant advance over the previously used techniques.

375 Interestingly, similar to a previous report (Donaldson, 2007), we observed that  
376 macrofibrils in both hardwood and softwood have a range of diameters. The reasons  
377 for this variation in size are not clear. It is possible that the number of individual  
378 cellulose microfibrils that come together to form the macrofibril structure in both  
379 hardwood and softwood is not constant. This may be regulated by coordinated  
380 movement of CesA complexes or their density during cell wall synthesis (Li et al.,  
381 2016). It was proposed that the macrofibril diameter is proportional to the degree of

382 cell wall lignification (Donaldson, 2007), which may also vary between the structures.  
383 This hypothesis is supported by our results which indicate that the cell wall lignin  
384 content influences microfibril diameter in Arabidopsis. Variations may also originate  
385 from environmental conditions. For example, it was shown that wood density may vary  
386 correlatively with climate change (Bouriaud et al., 2005). Although much of this effect  
387 is likely to be due to cell size and wall thickness, it can be hypothesized that change  
388 in wood density may also originate from compositional changes that impact microfibril  
389 assembly and ultrastructure. It would therefore be relevant to assess microfibrils of  
390 perennial trees with samples spanning several years of growth. We cannot rule out  
391 that the width variance may originate from the technical limitations of resolving the  
392 microfibrils by SEM. It will be interesting to see if the emerging He-ion technologies,  
393 with an increase in resolution and less dependent upon metal coating, reduce this  
394 variance (Joens et al., 2013). The cryo-SEM techniques developed as part of our study  
395 offer a significant advantage over the previous investigation (Donaldson, 2007) which  
396 applied a thicker coat of chromium (mostly 12 nm) that yield films with coarser grains  
397 than the thinner (3 nm) platinum films used in our work. Thus, taking the results  
398 described by Donaldson and our technological improvements into consideration, we  
399 believe that the variance in the microfibril width observed in both studies is likely to  
400 reflect natural material variation.

401 The prominence of microfibril structures in Arabidopsis cell walls is a surprising  
402 discovery of this study. Previously published results using AFM analysis indicate the  
403 presence of some bundled microfibrils in primary cell walls of Arabidopsis but the  
404 extent of this bundling is lower than what was observed in primary cell wall samples  
405 from other species (Zhang et al., 2016). AFM is not yet technically feasible for analysis  
406 of bundling of hydrated secondary cell walls although recent technical advances  
407 allowed visualisation of dried spruce wood at a nanometer resolution (Casdorff et al.,  
408 2017). The observation of the microfibrils by cryo-SEM in Arabidopsis allowed us to  
409 determine the contribution of cellulose, xylan, lignin and galactoglucomannan to  
410 microfibril formation, thanks to the availability of secondary cell wall related mutants  
411 in this model. Microfibrils were completely absent in vessel cell walls of *irx3* plants,  
412 which lack secondary cell wall cellulose, indicating that proper cellulose biosynthesis  
413 is required for formation and assembly of secondary cell walls polymers into  
414 microfibrils. In addition, we observed that vessel microfibril diameter is significantly

415 decreased in *irx9*, *irx10* and *esk1* plants, suggesting that xylan may also participate in  
416 the correct assembly of such structures. While in *irx9* and *irx10* reduction in macrofibril  
417 diameter may be associated with decrease in the xylan content the ~25% reduction in  
418 the median macrofibril diameter observed for *esk1* Arabidopsis is harder to explain.  
419 Hardwood xylan is proposed to interact with the hydrophilic surface of the cellulose  
420 microfibril as a two-fold screw (Simmons et al., 2016, Busse-Wicher et al., 2016a), and  
421 this interaction is facilitated by the even pattern of the [Me]GlcA and acetyl branches  
422 on the xylan backbone which is lost in *esk1* plants (Grantham et al., 2017). Therefore,  
423 the decrease in macrofibril diameter observed in *esk1* Arabidopsis indicates that  
424 xylancellulose interaction may have a role in spacing or proper coalescence of  
425 microfibrils to form the elementary macrofibril. It is unclear why the macrofibril diameter  
426 is reduced in *esk1*, but perhaps fewer elementary fibrils are incorporated into each  
427 macrofibril when xylan is not interacting with the hydrophilic surface of the cellulose  
428 fibril. This may be different to the effect observed in flax where the absence of xylan  
429 may lead to aggregation of glucan chains into larger fibres (Thomas et al., 2013). Such  
430 difference may be associated with variations in the stoichiometry of the cellulose  
431 synthase complex which were recently reported for angiosperms (Zhang et al., 2018).

432 In addition to implicating xylan in the process of macrofibril formation our results  
433 indicate that lignin may contribute to assembly of the structures. As such, our results  
434 use genetic assignment to extend previous work which has correlated macrofibril  
435 diameter with the degree of wall lignification (Donaldson, 2007). Interestingly, we  
436 observed that the macrofibril diameter does not correlate with the cell wall GGM  
437 content. This may be associated with low abundance of GGM in angiosperms where  
438 the polysaccharide accounts for only up to 5% of the cell wall material (Scheller and  
439 Ulvskov, 2010). Alternatively, this result may indicate that in Arabidopsis GGM might  
440 be not involved in macrofibril formation. GGM may play a more significant role in the  
441 macrofibril assembly in gymnosperms where it accounts for up to 30% of the cell wall  
442 material. Importantly, all our conclusions are based on the analysis of native, hydrated,  
443 cell wall samples. The assignment of cell wall macrofibril composition, in their native  
444 state, would be impossible using techniques such as immunogold due to the  
445 pretreatment steps needed before the antibody labelling.

446 In conclusion, our analysis indicates that vessel cell walls contain fibrous structures  
447 composed of cellulose, xylan and lignin. These structures are present in both  
448 hardwood and softwood and have a diameter larger than a single cellulose microfibril.  
449 Therefore, these structures can be described as cell wall macrofibrils. The reduction  
450 in macrofibril diameter observed in *esk1* Arabidopsis suggests that the interaction  
451 between xylan and the hydrophilic surface of the cellulose microfibril may be involved  
452 in the assembly of these structures. Therefore, this xylan-cellulose interaction may be  
453 important for the maintenance of plant cell wall ultrastructure and mechanical  
454 properties (Simmons et al., 2016). The techniques developed here and the discovery  
455 of the ubiquitous presence of macrofibrils in hardwood and softwood in their native  
456 state will contribute to a better understanding of cell wall assembly processes.  
457 Furthermore, the ability to resolve macrofibrils in Arabidopsis, along with the  
458 availability of genetic resources in this model, will offer the community a valuable tool  
459 to further study the complex deposition of secondary cell walls polymers and their role  
460 in defining the cell wall ultrastructure. The assembly of cell wall macrofibrils is likely to  
461 influence the properties of wood, such as density, which may vary due to different  
462 stimuli such as tree fertilisation (Makinen et al., 2002) or environmental changes  
463 (Bouriaud et al., 2005). Therefore, we expect that the methodology described here will  
464 enable to correlate the native nanoscale features of the cell walls, such as the  
465 macrofibril diameter, or a specific macrofibril patterning within the cell wall, with wood  
466 properties. Consequently, our approach may be useful to assess this aspect of wood  
467 quality at a new level and could benefit numerous industries ranging from building  
468 construction, paper manufacturing and biofuel production to generation of novel  
469 biomaterials such as nanocrystalline cellulose.

470

## 471 **Experimental procedures:**

### 472 *Plant material*

473 *Picea abies*, (spruce) one-year old branch was acquired from 30-50cm tall potted  
474 plants grown outdoors purchased from Scotsdale (Great Shelford, Cambridgeshire,  
475 UK). *Ginkgo biloba*, (Ginkgo) stem material was obtained from the trees grown at the  
476 Cambridge University Botanic Garden. For both spruce and Ginkgo, samples from two  
477 individuals were analysed.

478 Hybrid aspen (*Populus tremula* x *Populus tremuloides*, clone T89), referred to as  
479 poplar in the text, was grown *in vitro* (20°C, with a 16-h light, 8-h dark photoperiod,  
480 with illumination at 85 microeinsteins.m<sup>-2</sup>.s<sup>-1</sup>) during 76 to 80 days after  
481 micropropagation on 1/2MS media with vitamins (Duchefa M0222), 1% sucrose, 0.7%  
482 Agar. Samples from three individuals were analysed. For field grown poplar (*Populus*  
483 *tremula*), material was obtained from two individuals grown at the Cambridge  
484 University Botanic Garden.

485 *Arabidopsis thaliana* (*Arabidopsis*) Columbia-0 ecotype plants were grown in a cabinet  
486 maintained at 21 °C, with a 16-h light, 8-h dark photoperiod. Stem material was  
487 collected from 7-week-old plants. Mutant insertion lines described in published work  
488 were used in this study. Specifically, *irx3-7* plants (Simmons et al., 2016, Kumar and  
489 Turner, 2015), representing a mutant allele of *CESA7*, *irx9-1* (Brown et al., 2005),  
490 *irx10-1* (Brown et al., 2005), *esk1-5* (Lefebvre et al., 2011, Grantham et al., 2017),  
491 *4cl1-1* (Vanholme et al., 2012), *lac4-2* (Berthet et al., 2011) and *csla2-1csla3-2csla91*  
492 (Goubet et al., 2009). Plants were analysed alongside the wild type (WT) material.  
493 For each genotype three individuals were analysed.

#### 494 *Cryo-SEM sample preparation and imaging*

495 Fresh stems of 7 week old *Arabidopsis* plants were prepared for imaging as outlined  
496 in Supporting Information Figure S1. Firstly, 1 cm length sections were cut from the  
497 bottom part of the stems and mounted vertically in recessed stubs containing a cryo  
498 glue preparation consisting of a 3:1 mixture of Tissue-Tec (Scigen Scientific, USA) and  
499 Aquadog colloidal graphite (Agar Scientific, Stansted, UK) (see steps 1 to 4 on Figure  
500 S1). Stem sections were immediately (within 5 minutes of harvest) plunge frozen in  
501 liquid nitrogen slush (step 5 on Figure S1), transferred under vacuum, fractured and  
502 then coated with 3 nm of platinum (step 6 on Figure S1) using a PT3010T cryo-  
503 apparatus fitted with a film thickness monitor (Quorum Technologies, Lewes, UK). The  
504 short time between freezing and harvesting serves to prevent drying of the sample  
505 where only the exposed surface, not the fractured face, is expected to exhibit some  
506 water loss during the short time it is exposed to air. Finally, fractured stems were  
507 imaged using a Zeiss EVO HD15 Scanning Electron Microscope (step 7 on Figure S1)  
508 and maintained at -145 °C using a Quorum cryo-stage assembly. The electron source  
509 is a Lanthanum Hexaboride HD filament. Images were acquired using a secondary



510 electron detector and an accelerating voltage of between 5 and 8 kV with a working  
511 distance between 4 and 6 mm. Quantification of the width of cell wall macrofibrils was  
512 performed using ImageJ software (Schneider et al., 2012). For the measurements of  
513 each macrofibril, a line was drawn parallel to the fibril axis. The length of a second line,  
514 perpendicular to the fibril axis line and across the width of the macrofibril, was  
515 quantified as the macrofibril width (Figure S2). Each fibril width measurement was  
516 standardised for the platinum layer applied during the coating process by subtracting  
517 the width of the standardised coat from the original measurement. Imaging without the  
518 cryo-preservation was performed by visualising hand sectioned platinum coated  
519 specimens with the stage maintained at room temperature. For preparation of these  
520 samples all freezing steps were omitted.

521

### 522 *Sampling and statistical analysis*

523 For spruce, Ginkgo and field grown poplar, stem sections were taken from two  
524 individual trees and 150 macrofibrils were measured from three tracheids that had  
525 each been coated with platinum separately. Imaging of poplar was performed in  
526 technical triplicate from three *in vitro* grown trees and 150 poplar macrofibrils were  
527 measured from three separately coated vessels as for the gymnosperm samples. For  
528 Arabidopsis, cryo-SEM imaging of vessels was carried out on three biological  
529 replicates, each from separate individuals. 150 macrofibril diameters were measured  
530 across the three individuals.

531 Statistical analysis was performed using packages available with R software (Team,  
532 2014). Statistical tests, either Student's T test or ANOVA, used to compare average  
533 measurements for samples are defined in Figure legends. The variance between each  
534 pairwise combination was estimated to be similar with Levene's test.

### 535 *Data statement*

536 All data for the quantification of the macrofibril diameter is presented on Figures  
537 forming part of the manuscript. Representative images are provided for each  
538 genotype/species for which macrofibril diameter data is provided. All images obtained  
539 for the different species and genotypes analysed as part of this manuscript are  
540 available from Jan J Lyczakowski ([jjl55@cam.ac.uk](mailto:jjl55@cam.ac.uk)).

541

542 **Accession numbers**

543 Mutants in the following genes in the Col-0 ecotype were analysed as part of this  
544 study:

545 AT5G17420 (*irx3-7*)

546 AT2G37090 (*irx9-1*)

547 AT1G27440 (*irx10-1*)

548 AT3G55990 (*esk1-5*)

549 AT1G51680 (*4cl1-1*)

550 AT2G38080 (*lac4-2*)

551 AT5G22740 (*csla2-1*)

552 AT1G23480 (*csla3-2*) AT5G03760

553 (*csla9-1*)

554

555 **List of abbreviations**

556 1D – one dimensional

557 AFM – atomic force microscopy Cesa – Cellulose

558 synthase cryo-SEM – low temperature scanning electron

559 microscopy FE-SEM – field emission scanning electron

560 microscopy

561 FT-IR - Fourier-transform infrared spectroscopy

562 GGM – galactoglucomannan

563 He-ion – Helium ion

564 IRX – irregular xylem

565 [Me]GlcA – methylated and unmethylated form of glucuronic acid

566 NMR – nuclear magnetic resonance

567 SANS – small angle neutron scattering

568 TEM – transmission electron microscopy

569 WAXS – wide angle x-ray scattering

570

## 571 **Acknowledgements**

572 We would like to thank Dr Nadine Anders and Dr Henry Temple for helpful discussions  
573 and critical reading of the manuscript. This work was supported by the Leverhulme  
574 Trust Centre for Natural Material Innovation. Analysis of Arabidopsis mutant plants  
575 was supported as part of The Center for LignoCellulose Structure and Formation, an  
576 Energy Frontier Research Center funded by the U.S. Department of Energy (DOE),  
577 Office of Science, Basic Energy Sciences (BES), under Award # DE-SC0001090. J.J.L.  
578 was in receipt of a studentship from the Biotechnology and Biological Sciences  
579 Research Council (BBSRC) of the UK as part of the Cambridge BBSRC-DTP  
580 Programme (Reference BB/J014540/1). MB is employed in YH's team through the  
581 European Research Council Advanced Investigator Grant SYMDEV (No. 323052). YH  
582 laboratory is funded by the Finnish Centre of Excellence in Molecular Biology of  
583 Primary Producers (Academy of Finland CoE program 2014-2019) (decision  
584 #271832); the Gatsby Foundation (GAT3395/PR3); the National Science Foundation  
585 Biotechnology and Biological Sciences Research Council grant (BB/N013158/1);  
586 University of Helsinki (award 799992091), and the European Research Council  
587 Advanced Investigator Grant SYMDEV (No. 323052). OMT was a recipient of an  
588 iCASE studentship from the BBSRC (Reference BB/M015432/1). We thank Gareth  
589 Evans for help with cryo-SEM sample preparation. The cryo-SEM facility at the  
590 Sainsbury Laboratory is supported by the Gatsby Charitable Foundation. We are  
591 grateful to Cambridge University Botanic Garden for access to the *Populus tremula*  
592 and *Ginkgo biloba* collections.

593 The authors declare no conflict of interest.

594

## 595 **Author contributions**

596 JJJ designed the study, conducted the experiments, analysed the data and wrote the  
597 paper. MB performed poplar imaging experiments, analysed the data and wrote the  
598 paper. OMT analysed the data and wrote the paper. YH contributed to data analysis  
599 and manuscript preparation, RW designed the study, conducted experiments,  
600 analysed the data and wrote the paper. PD designed the study and contributed to data  
601 analysis and manuscript preparation.

602

603

604

## 605 **Short legends for supporting information:**

606 Figure S1: Overview of the cryo-SEM procedure.

607 Figure S2: Measurement of macrofibril diameter.

608 Figure S3: Cryo-SEM analysis of Ginkgo cell walls.

609 Figure S4: Comparison of macrofibril diameter in Arabidopsis, poplar, spruce and  
610 Ginkgo.

611 Figure S5: Imaging of macrofibrils in field grown poplar.

612 Figure S6: Analysis of native Arabidopsis samples without the cryo-preservation  
613 protocol.

614 Figure S7: Cryo-SEM analysis of vessel collapse and primary cell wall cellulose in  
615 *irx3* Arabidopsis plants.

616

## 617 **References**

- 618 ABE, H., FUNADA, R., OHTANI, J. & FUKAZAWA, K. 1997. Changes in the  
619 arrangement of cellulose microfibrils associated with the cessation of cell  
620 expansion in tracheids. *Trees-Structure and Function*, 11, 328-332.  
621 BAUER, S., VASU, P., PERSSON, S., MORT, A. J. & SOMERVILLE, C. R. 2006.  
622 Development and application of a suite of polysaccharide-degrading enzymes

- 623 for analyzing plant cell walls. *Proceedings of the National Academy of*  
624 *Sciences of the United States of America*, 103, 11417-11422.
- 625 BERTHET, S., DEMONT-CAULET, N., POLLET, B., BIDZINSKI, P., CEZARD, L., LE  
626 BRIS, P., BORREGA, N., HERVE, J., BLONDET, E., BALZERGUE, S.,  
627 LAPIERRE, C. & JOUANIN, L. 2011. Disruption of LACCASE4 and 17  
628 Results in Tissue-Specific Alterations to Lignification of *Arabidopsis thaliana*  
629 Stems. *Plant Cell*, 23, 1124-1137.
- 630 BONAWITZ, N. D. & CHAPPLE, C. 2010. The Genetics of Lignin Biosynthesis:  
631 Connecting Genotype to Phenotype. *Annual Review of Genetics*, Vol 44, 44,  
632 337-363.
- 633 BOURIAUD, O., LEBAN, J. M., BERT, D. & DELEUZE, C. 2005. Intra-annual  
634 variations in climate influence growth and wood density of Norway spruce.  
635 *Tree Physiology*, 25, 651-660.
- 636 BROMLEY, J. R., BUSSE-WICHER, M., TRYFONA, T., MORTIMER, J. C., ZHANG,  
637 Z., BROWN, D. M. & DUPREE, P. 2013. GUX1 and GUX2  
638 glucuronyltransferases decorate distinct domains of glucuronoxylan with  
639 different substitution patterns. *Plant Journal*, 74, 423-434.
- 640 BROWN, D. M., GOUBET, F., VICKY, W. W. A., GOODACRE, R., STEPHENS, E.,  
641 DUPREE, P. & TURNER, S. R. 2007. Comparison of five xylan synthesis  
642 mutants reveals new insight into the mechanisms of xylan synthesis. *Plant*  
643 *Journal*, 52, 1154-1168.
- 644 BROWN, D. M., ZEEF, L. A. H., ELLIS, J., GOODACRE, R. & TURNER, S. R. 2005.  
645 Identification of novel genes in *Arabidopsis* involved in secondary cell wall  
646 formation using expression profiling and reverse genetics. *Plant Cell*, 17,  
647 2281-2295.
- 648 BUSSE-WICHER, M., GOMES, T. C. F., TRYFONA, T., NIKOLOVSKI, N., STOTT,  
649 K., GRANTHAM, N. J., BOLAM, D. N., SKAF, M. S. & DUPREE, P. 2014. The  
650 pattern of xylan acetylation suggests xylan may interact with cellulose  
651 microfibrils as a twofold helical screw in the secondary plant cell wall of  
652 *Arabidopsis thaliana*. *Plant Journal*, 79, 492-506.
- 653 BUSSE-WICHER, M., GRANTHAM, N. J., LYCZAKOWSKI, J. J., NIKOLOVSKI, N. &  
654 DUPREE, P. 2016a. Xylan decoration patterns and the plant secondary cell wall  
655 molecular architecture. *Biochemical Society Transactions*, 44, 74-78. BUSSE-  
656 WICHER, M., LI, A., SILVEIRA, R. L., PEREIRA, C. S., TRYFONA, T., GOMES, T.  
657 C. F., SKAF, M. S. & DUPREE, P. 2016b. Evolution of Xylan Substitution Patterns in  
658 Gymnosperms and Angiosperms: Implications for Xylan Interaction with Cellulose.  
659 *Plant Physiology*, 171, 2418-2431.
- 660 CASDORFF, K., KEPLINGER, T., BURGERT, I. 2017. Nono-mechanical  
661 characterisation of the wood cell wall by AFM studies: comparison between  
662 AC- and QI™ mode. *Plant Methods*, 13, 60.
- 663 COCHARD, H., FROUX, F., MAYR, F. F. S. & COUTAND, C. 2004. Xylem wall  
664 collapse in water-stressed pine needles. *Plant Physiology*, 134, 401-408.
- 665 COSGROVE, D. J. 2014. Re-constructing our models of cellulose and primary cell  
666 wall assembly. *Current Opinion in Plant Biology*, 22, 121-131.
- 667 DICK-PEREZ, M., ZHANG, Y. A., HAYES, J., SALAZAR, A., ZABOTINA, O. A.,  
668 HONG, M. 2011. Structure and interactions of plant cell-wall polysaccharides  
669 by two- and three-dimensional magic-angle-spinning solid-state NMR.  
670 *Biochemistry*, 50, 989-1000.

- 671 DONALDSON, L. 2007. Cellulose microfibril aggregates and their size variation with  
672 cell wall type. *Wood Science and Technology*, 41, 443-460.
- 673 ELBAUM, R., GORB, S., FRATZL, P. 2008. Structures in the cell wall that enable  
674 hygroscopic movement of wheat awns. *Journal of Structural Biology*, 164,  
675 101-107.
- 676 FAHLEN, J. & SALMEN, L. 2002. On the Lamellar Structure of the Tracheid Cell  
677 Wall. *Plant Biology*, 4, 339-345.
- 678 FAVERY, B., RYAN, E., FOREMAN, J., LINSTED, P., BOUDONCK, K., STEER,  
679 M., SHAW, P. & DOLAN, L. 2001. KOJAK encodes a cellulose synthase-like  
680 protein required for root hair cell morphogenesis in Arabidopsis. *Genes &  
681 Development*, 15, 79-89.
- 682 FERNANDES, A. N., THOMAS, L. H., ALTANER, C. M., CALLOW, P., FORSYTH,  
683 V. T., APPERLEY, D. C., KENNEDY, C. J. & JARVIS, M. C. 2011.  
684 Nanostructure of cellulose microfibrils in spruce wood. *Proceedings of the  
685 National Academy of Sciences of the United States of America*, 108,  
686 E1195E1203.
- 687 FROMM, J., ROCKEL, B., LAUTNER, S., WINDEISEN, E. & WANNER, G. 2003.  
688 Lignin distribution in wood cell walls determined by TEM and backscattered  
689 SEM techniques. *Journal of Structural Biology*, 143, 77-84.
- 690 FUJITA, M., HIMMELSPACH, R., WARD, J., WHITTINGTON, A., HASENBEIN, N.,  
691 LIU, C., TRUONG, T. T., GALWAY, M. E., MANSFIELD, S. D., HOCART, C.  
692 H. & WASTENEYS, G. O. 2013. The anisotropy1 D604N Mutation in the  
693 Arabidopsis Cellulose Synthase1 Catalytic Domain Reduces Cell Wall  
694 Crystallinity and the Velocity of Cellulose Synthase Complexes. *Plant  
695 Physiology*, 162, 74-85.
- 696 GIERLINGER, N. 2018. New insights into plant cell walls by vibrational  
697 microspectroscopy. *Applied Spectroscopy Reviews*, 53, 517-551.
- 698 GONNEAU, M., DESPREZ, T., GUILLOT, A., VERNHETTES, S. & HOFTE, H. 2014.  
699 Catalytic Subunit Stoichiometry within the Cellulose Synthase Complex. *Plant  
700 Physiology*, 166, 1709-1712.
- 701 GOUBET, F., BARTON, C. J., MORTIMER, J. C., YU, X. L., ZHANG, Z. N., MILES,  
702 G. P., RICHENS, J., LIEPMAN, A. H., SEFFEN, K. & DUPREE, P. 2009. Cell  
703 wall glucomannan in Arabidopsis is synthesised by CSLA  
704 glycosyltransferases, and influences the progression of embryogenesis. *Plant  
705 Journal*, 60, 527-538.
- 706 GRANTHAM, N. J., WURMAN-RODRICH, J., TERRETT, O. M., LYCZAKOWSKI, J.  
707 J., STOTT, K., IUGA, D., SIMMONS, T. J., DURAND-TARDIF, M., BROWN,  
708 S. P., DUPREE, R., BUSSE-WICHER, M. & DUPREE, P. 2017. An even  
709 pattern of xylan substitution is critical for interaction with cellulose in plant cell  
710 walls. *Nature Plants*, 3, 859-865.
- 711 HILL, J. L., HAMMUDI, M. B. & TIEN, M. 2014. The Arabidopsis Cellulose Synthase  
712 Complex: A Proposed Hexamer of CESA Trimers in an Equimolar  
713 Stoichiometry. *Plant Cell*, 26, 4834-4842.
- 714 HIMMELSPACH, R., WILLIAMSON, R. E. & WASTENEYS, G. O. 2003. Cellulose  
715 microfibril alignment recovers from DCB-induced disruption despite  
716 microtubule disorganization. *Plant Journal*, 36, 565-575.

- 717 JARVIS, M. C. 2018. Structure of native cellulose microfibrils, the starting point for  
718 nanocellulose manufacture. *Philosophical transactions. Series A,*  
719 *Mathematical, physical, and engineering sciences*, 376.
- 720 JOENS, M. S., HUYNH, C., KASUBOSKI, J. M., FERRANTI, D., SIGAL, Y. J.,  
721 ZEITVOGEL, F., OBST, M., BURKHARDT, C. J., CURRAN, K. P.,  
722 CHALASANI, S. H., STERN, L. A., GOETZE, B. & FITZPATRICK, J. A. J.  
723 2013. Helium Ion Microscopy (HIM) for the imaging of biological samples at  
724 sub-nanometer resolution. *Scientific Reports*, 3. KANG, X., KIRUI, A.,  
725 DICKWELLA WIDANAGE, M. C., MENTINK-VIGIER, F., COSGROVE, D. J.,  
726 WANG, T. 2019. Lignin-polysaccharide interactions in plant secondary cell  
727 walls revealed by solid-state NMR. *Nature Communications*, 10, 347.
- 728 KUMAR, M. & TURNER, S. 2015. Protocol: a medium-throughput method for  
729 determination of cellulose content from single stem pieces of *Arabidopsis*  
730 *thaliana*. *Plant Methods*, 11.
- 731 LEFEBVRE, V., FORTABAT, M. N., DUCAMP, A., NORTH, H. M.,  
732 MAIAGRONDARD, A., TROUVERIE, J., BOURSAC, Y., MOUILLE, G. &  
733 DURAND-TARDIF, M. 2011. ESKIMO1 Disruption in *Arabidopsis* Alters  
734 Vascular Tissue and Impairs Water Transport. *Plos One*, 6.
- 735 LI, S. D., BASHLINE, L., ZHENG, Y. Z., XIN, X. R., HUANG, S. X., KONG, Z. S.,  
736 KIM, S. H., COSGROVE, D. J. & GU, Y. 2016. Cellulose synthase complexes  
737 act in a concerted fashion to synthesize highly aggregated cellulose in  
738 secondary cell walls of plants. *Proceedings of the National Academy of*  
739 *Sciences of the United States of America*, 113, 11348-11353.
- 740 LI, Y., KIM, J. I., PYSH, L. & CHAPPLE, C. 2015. Four Isoforms of *Arabidopsis*  
741 4Coumarate: CoA Ligase Have Overlapping yet Distinct Roles in  
742 Phenylpropanoid Metabolism. *Plant Physiology*, 169, 2409-2421.
- 743 LOQUE, D., SCHELLER, H. V. & PAULY, M. 2015. Engineering of plant cell walls for  
744 enhanced biofuel production. *Current Opinion in Plant Biology*, 25, 151-161.
- 745 LYCZAKOWSKI, J. J., WICHER, K. B., TERRETT, O. M., FARIA-BLANC, N., YU, X.  
746 L., BROWN, D., KROGH, K., DUPREE, P. & BUSSE-WICHER, M. 2017.  
747 Removal of glucuronic acid from xylan is a strategy to improve the conversion  
748 of plant biomass to sugars for bioenergy. *Biotechnology for Biofuels*, 10.
- 749 MAKINEN, H., SARANPAA, P. & LINDER, S. 2002. Wood-density variation of  
750 Norway spruce in relation to nutrient optimization and fibre dimensions.  
751 *Canadian Journal of Forest Research-Revue Canadienne De Recherche*  
752 *Forestiere*, 32, 185-194.
- 753 MARGA, F., GRANDBOIS, M., COSGROVE, D. J. & BASKIN, T. I. 2005. Cell wall  
754 extension results in the coordinate separation of parallel microfibrils: evidence  
755 from scanning electron microscopy and atomic force microscopy. *Plant*  
756 *Journal*, 43, 181-190.
- 757 MARTINEZ-ABAD, A., BERGLUND, J., TORIZ, G., GATENHOLM, P.,  
758 HENRIKSSON, G., LINDSTROM, M., WOHLERT, J. & VILAPLANA, F. 2017.  
759 Regular Motifs in Xylan Modulate Molecular Flexibility and Interactions with  
760 Cellulose Surfaces. *Plant Physiology*, 175, 1579-1592.
- 761 NIKLAS, K. 2004. The cell walls that bind the tree of life. *BioScience*, 54, 831-841.
- 762 NISHIMURA, H., KAMIYA, A., NAGATA, T., KATAHIRA, M. & WATANABE, T. 2018.  
763 Direct evidence for alpha ether linkage between lignin and carbohydrates in  
764 wood cell walls. *Scientific Reports*, 8.

- 765 PAN, Y. D., BIRDSEY, R. A., FANG, J. Y., HOUGHTON, R., KAUPPI, P. E., KURZ,  
766 W. A., PHILLIPS, O. L., SHVIDENKO, A., LEWIS, S. L., CANADELL, J. G.,  
767 CIAIS, P., JACKSON, R. B., PACALA, S. W., MCGUIRE, A. D., PIAO, S. L.,  
768 RAUTIAINEN, A., SITCH, S. & HAYES, D. 2011. A Large and Persistent  
769 Carbon Sink in the World's Forests. *Science*, 333, 988-993.
- 770 PAULY, M. & KEEGSTRA, K. 2008. Cell-wall carbohydrates and their modification  
771 as a resource for biofuels. *Plant Journal*, 54, 559-568.
- 772 PURBASHA, S., BOSNEAGA, E. AUER, M. 2009. Plant cell walls throughout  
773 evolution: towards a molecular understanding of their design principles.  
774 *Journal of Experimental Botany*, 60, 3615-3635.
- 775 RALPH, J., LUNDQUIST, K., BRUNOW, G., LU, F., KIM, H., SCHATZ, P. F.,  
776 MARITA, J. M., HATFIELD, R. D., RALPH, S. A., CHRISTENSEN, J. H.,  
777 BOERJAN, W. 2004. Lignins: natural polymers from oxidative coupling of  
778 4hydroxyphenyl- propanoids. *Phytochemistry Reviews*, 3, 29-60.
- 779 RAMAGE, M. H., BURRIDGE, H., BUSSE-WICHER, M., FEREDAY, G.,  
780 REYNOLDS, T., SHAH, D. U., WU, G. L., YU, L., FLEMING, P.,  
781 DENSLEYTINGLEY, D., ALLWOOD, J., DUPREE, P., LINDEN, P. F. &  
782 SCHERMAN, O. 2017. The wood from the trees: The use of timber in  
783 construction. *Renewable & Sustainable Energy Reviews*, 68, 333-359.
- 784 REFREGIER, G., PELLETIER, S., JAILLARD, D. & HOFTE, H. 2004. Interaction  
785 between wall deposition and cell elongation in dark-grown hypocotyl cells in  
786 *Arabidopsis*. *Plant Physiology*, 135, 959-968.
- 787 SANSINENA, M., SANTOS, M. V., ZARITZKY, N., CHIRIFE, J. 2012. Comparison of  
788 heat transfer in liquid and slush nitrogen by numerical simulation of cooling  
789 rates for French straws used for sperm cryopreservation. *Theriogenology*, 77,  
790 1717-1721.
- 791 SCHELLER, H. V. & ULVSKOV, P. 2010. Hemicelluloses. *Annual Review of Plant*  
792 *Biology*, Vol 61, 61, 263-289.
- 793 SCHNEIDER, C. A., RASBAND, W. S. & ELICEIRI, K. W. 2012. NIH Image to  
794 ImageJ: 25 years of image analysis. *Nature Methods*, 9, 671-675.
- 795 SCHWEINGRUBER, F. H. 2007. *Wood structure and environment*, Berlin, Springer.
- 796 SCZOSTAK, A. 2009. Cotton Linters: An Alternative Cellulosic Raw Material.  
797 *Macromolecular Symposia*, 280, 45-53.
- 798 SIMMONS, T. J., MORTIMER, J. C., BERNARDINELLI, O. D., POPPLER, A. C.,  
799 BROWN, S. P., DEAZEVEDO, E. R., DUPREE, R. & DUPREE, P. 2016.  
800 Folding of xylan onto cellulose fibrils in plant cell walls revealed by solid-state  
801 NMR. *Nature Communications*, 7.
- 802 TAKENAKA, Y., WATANABE, Y., SCHUETZ, M., UNDA, F., HILL, J., PHOOKAEW,  
803 P., YONEDA, A., MANSFIELD, S. D., SAMUELS, L., OHTANI, M & DEMURA,  
804 T. 2018. Patterned deposition of xylan and lignin is independent from that of  
805 the secondary wall cellulose of *Arabidopsis* xylem vessels. *Plant Cell*, 30,  
806 2663-2676.
- 807 TAYLOR, N. G., SCHEIBLE, W. R., CUTLER, S., SOMERVILLE, C. R. & TURNER,  
808 S. R. 1999. The irregular xylem3 locus of *arabidopsis* encodes a cellulose  
809 synthase required for secondary cell wall synthesis. *Plant Cell*, 11, 769-779.
- 810 TEAM, R. C. 2014. *R: A language and environment for statistical computing*.  
811 [Online]. Vienna Austria. Available: <http://www.R-project.org/> [Accessed].



- 812 TERASHIMA, N., KITANO, K., KOJIMA, M., YOSHIDA, M., YAMAMOTO, H. &  
813 WESTERMARK, U. 2009. Nanostructural assembly of cellulose,  
814 hemicellulose, and lignin in the middle layer of secondary wall of ginkgo  
815 tracheid. *Journal of Wood Science*, 55, 409-416.
- 816 TERRETT, O. M., DUPREE, P. 2019. Covalent interactions between lignin and  
817 hemicelluloses in plant secondary cell walls. *Current Opinion in*  
818 *Biotechnology*, 56, 97-104.
- 819 THOMAS, L. H., ALTANER, C. M. & JARVIS, M. C. 2013. Identifying multiple forms  
820 of lateral disorder in cellulose fibres. *Journal of Applied Crystallography*, 46,  
821 972-979.
- 822 THOMAS, L. H., FORSYTH, V. T., MARTEL, A., GRILLO, I., ALTANER, C. M. &  
823 JARVIS, M. C. 2014. Structure and spacing of cellulose microfibrils in woody  
824 cell walls of dicots. *Cellulose*, 21, 3887-3895.
- 825 THOMAS, L. H., FORSYTH, V. T., MARTEL, A., GRILLO, I., ALTANER, C. M. &  
826 JARVIS, M. C. 2015. Diffraction evidence for the structure of cellulose  
827 microfibrils in bamboo, a model for grass and cereal celluloses. *Bmc Plant*  
828 *Biology*, 15.
- 829 TURNER, S. & KUMAR, M. 2017. Cellulose synthase complex organization and  
830 cellulose microfibril structure. *Philosophical Transactions of the Royal Society*  
831 *A*, 376.
- 832 TURNER, S. R. & SOMERVILLE, C. R. 1997. Collapsed xylem phenotype of  
833 *Arabidopsis* identifies mutants deficient in cellulose deposition in the  
834 secondary cell wall. *Plant Cell*, 9, 689-701.
- 835 VANHOLME, R., DEMEDTS, B., MORREEL, K., RALPH, J., BOERJAN, W. 2010.  
836 Lignin biosynthesis and structure. *Plant Physiology*, 132, 1781-1789.
- 837 VANHOLME, R., STORME, V., VANHOLME, B., SUNDIN, L., CHRISTENSEN, J. H.,  
838 GOEMINNE, G., HALPIN, C., ROHDE, A., MORREEL, K. & BOERJAN, W.  
839 2012. A Systems Biology View of Responses to Lignin Biosynthesis  
840 Perturbations in *Arabidopsis*. *Plant Cell*, 24, 3506-3529.
- 841 WHITNEY, S. E. C., BRIGHAM, J. E., DARKE, A. H., REID, J. S. G. & GIDLEY, M. J.  
842 1998. Structural aspects of the interaction of mannan-based polysaccharides  
843 with bacterial cellulose. *Carbohydrate Research*, 307, 299309.
- 844 XIONG, G., CHENG, K. & PAULY, M. Xylan O-Acetylation Impacts Xylem  
845 Development and Enzymatic Recalcitrance as Indicated by the *Arabidopsis*  
846 Mutant *tbl29*. *Molecular Plant*, 6, 1373-1375.
- 847 YU, L., LYCZAKOWSKI, J. J., PEREIRA, C. S., KOTAKE, T., YU, X., LI, A.,  
848 MOGELSVANG, S., SKAF, M. S. & DUPREE, P. 2018. The patterned  
849 structure of galactoglucomannan suggests it may bind to cellulose in seed  
850 mucilage. *Plant Physiology*, 178, 1011-1026.
- 851 ZHANG, T., ZHENG, Y. Z. & COSGROVE, D. J. 2016. Spatial organization of  
852 cellulose microfibrils and matrix polysaccharides in primary plant cell walls as  
853 imaged by multichannel atomic force microscopy. *Plant Journal*, 85, 179-192.
- 854 ZHANG, X. Y., DOMINGUEZ, P. G., KUMAR, M., BYGDELL, J.,  
855 MIROSHNICHENKO, S., SUNDBERG, B., WINGSLE, G. & NIITTYLA, T.  
856 2018. Cellulose Synthase Stoichiometry in Aspen Differs from *Arabidopsis*  
857 and Norway Spruce. *Plant Physiology*, 177, 1096-1107.

858

859 **Figure legends**

860 **Figure 1. cryo-SEM analysis of spruce stem sections. (a) to (f)** Representative  
861 images of stem sections of one-year-old spruce branch at different magnifications. Red  
862 arrows indicate tracheids **(b)**, macrofibril bundles **(c and d)** and individual macrofibrils  
863 **(e and f)**. Scale bars are provided for each image.

864 **Figure 2. cryo-SEM analysis of poplar stem sections (a) to (e)** Representative  
865 images of stem sections of *in vitro* grown poplar trees at different magnifications. Red  
866 arrows show vessels **(b)** and macrofibrils **(c and e)**. Yellow arrows indicate fibre cells  
867 **(b)**. Higher magnification images **(c, d and e)** are presented for vessels. Scale bars  
868 are provided for each image. **(f)** Diameter of spruce tracheid cell wall fibrils compared  
869 to these observed in poplar vessel cell walls. For each bar 150 individual fibrils were  
870 measured. Boxplots mark the median and show between 25<sup>th</sup> and 75<sup>th</sup> percentile of  
871 the data. \*\*\* denotes  $p \leq 0.00001$  in Student's t-test.

872 **Figure 3. Analysis of Arabidopsis stem sections and fibrous cellulose. (a) to (c)**  
873 Imaging of WT vessels at increasing magnification **(d)** Imaging of fibrous cellulose  
874 standard from cotton linters shows cell wall fibrils with an appearance similar to  
875 structures seen *in planta*. **(e)** Imaging of individual vessels in WT plants. **(f)** Imaging of  
876 individual vessels in *irx3* plants. **(g)** and **(f)** Macrofibrils are detectable in WT  
877 Arabidopsis and are absent in *irx3* secondary cell walls. Red arrows indicate the  
878 macrofibril structures throughout the figure. Scale bars are provided for each image.

879 **Figure 4. Analysis of macrofibrils in mutant Arabidopsis plants.** Representative  
880 image of **(a) *irx9*, (b) *irx10*, (c) *esk1*, (d) *4cl1*, (e) *lac4* and (f) *cls1a2/3/9*** Arabidopsis  
881 macrofibrils. Scale bar corresponds to 200 nm on each image. **(g)** Quantification of  
882 macrofibril diameter in WT and mutant Arabidopsis plants. N = 150. Boxplots mark a  
883 median and show between 25<sup>th</sup> and 75<sup>th</sup> percentile of the data. \*\*\* denotes  $p \leq$   
884 0.00001, \*\* denotes  $p \leq 0.0001$ , \* denotes  $p \leq 0.05$  in Tukey test following ANOVA  
885 when compared to WT, ns indicates lack of statistically significant difference.

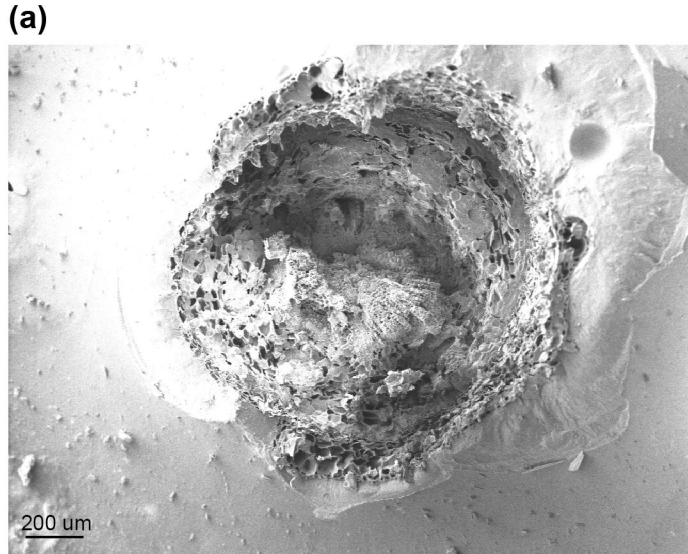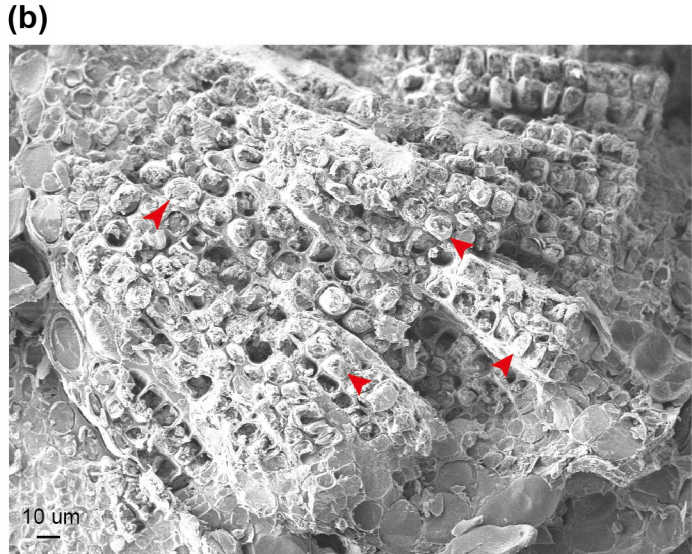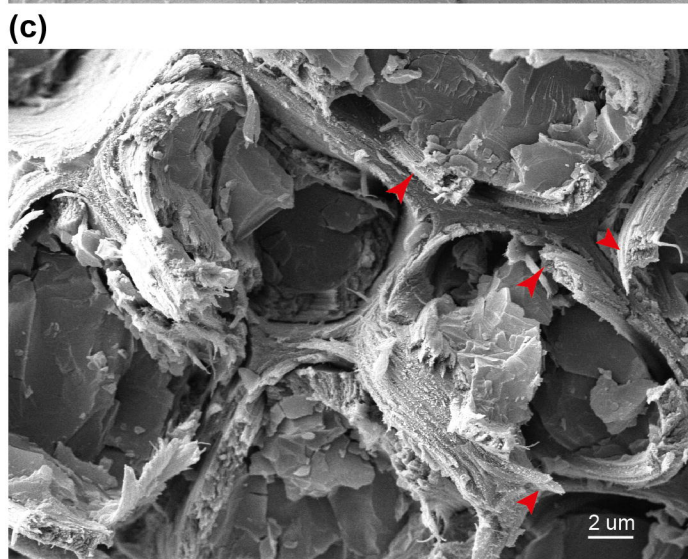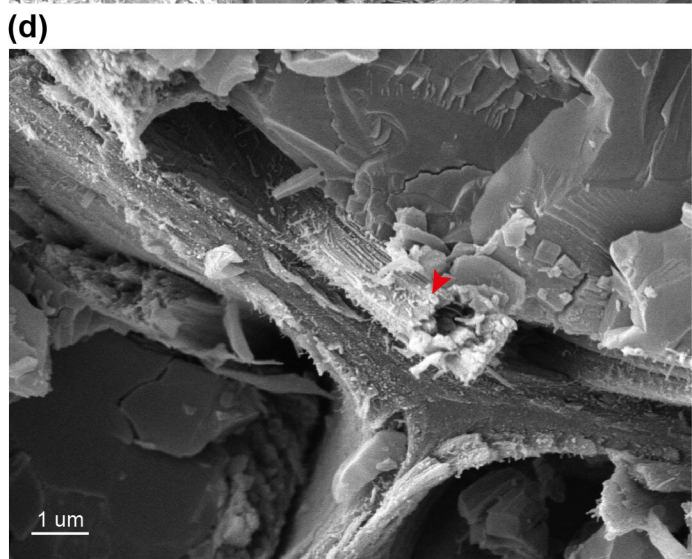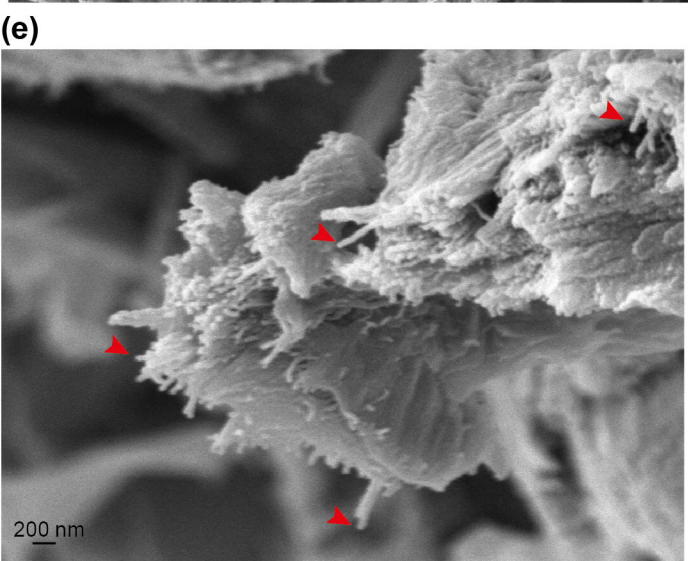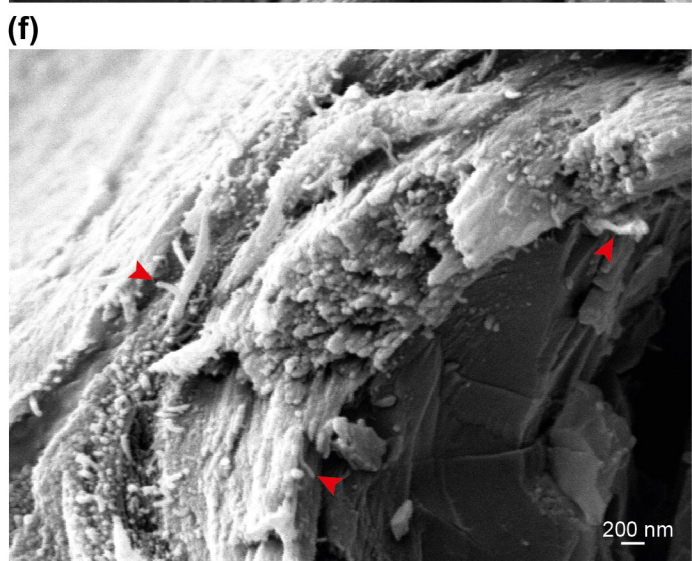

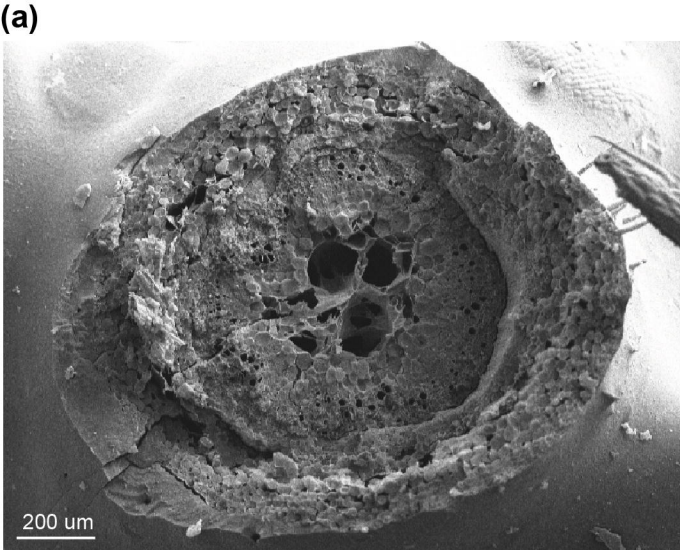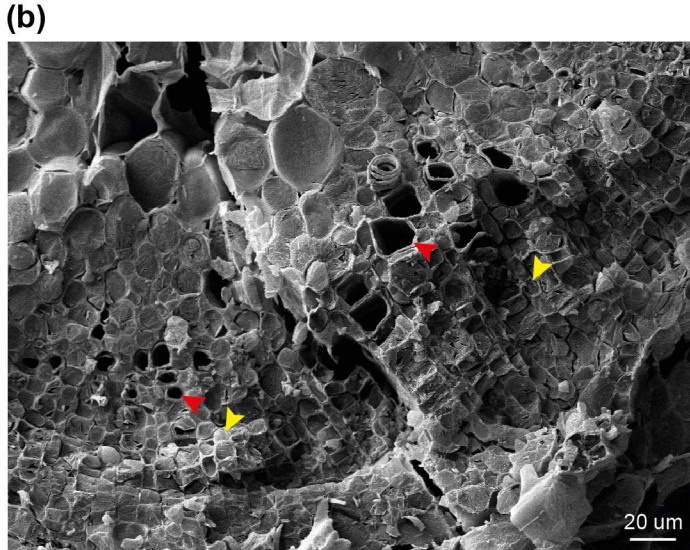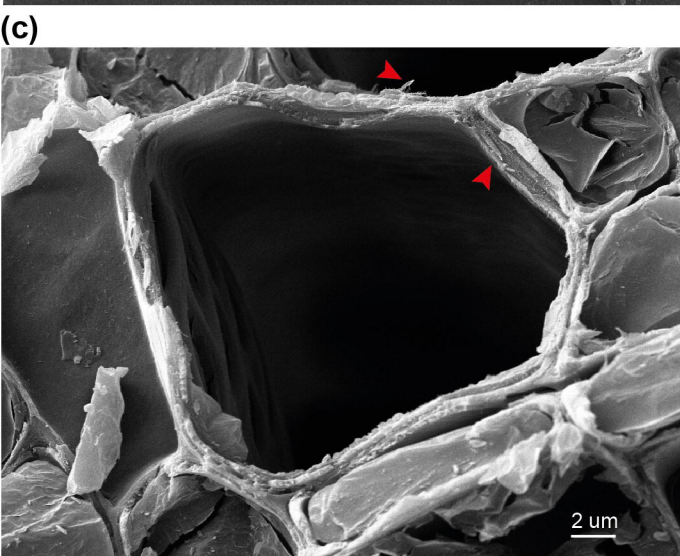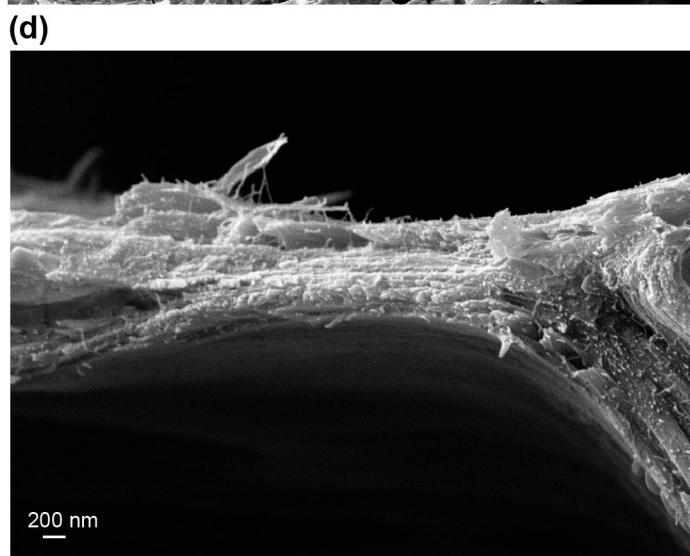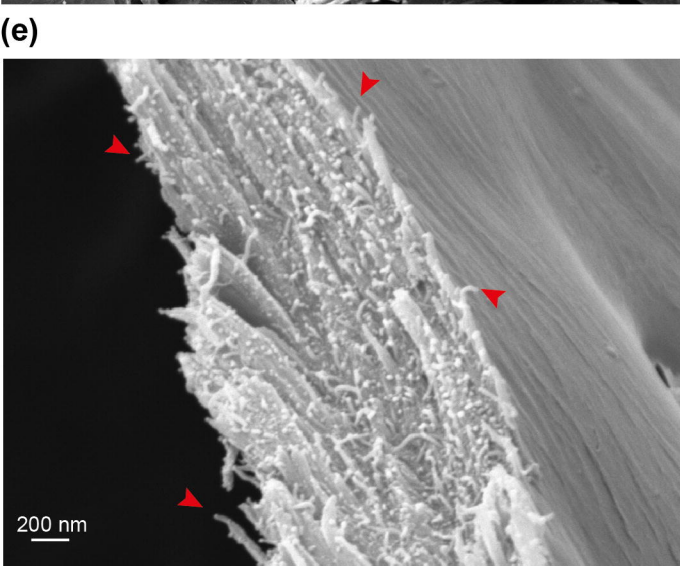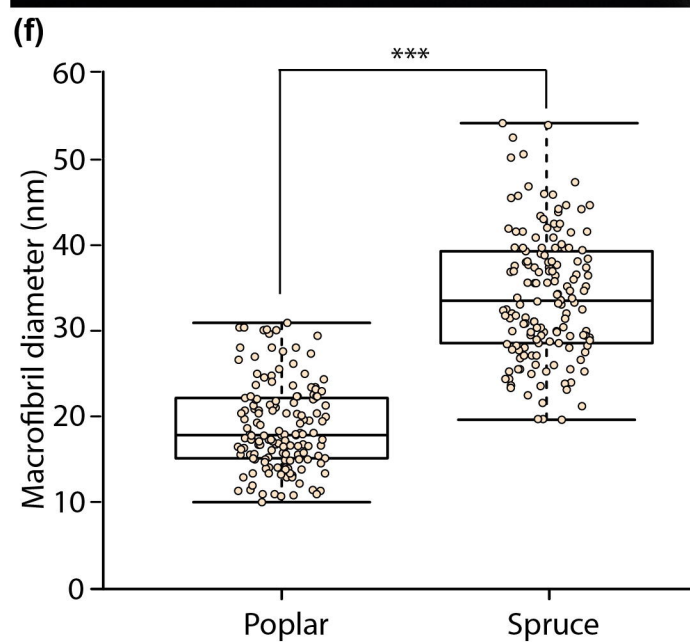

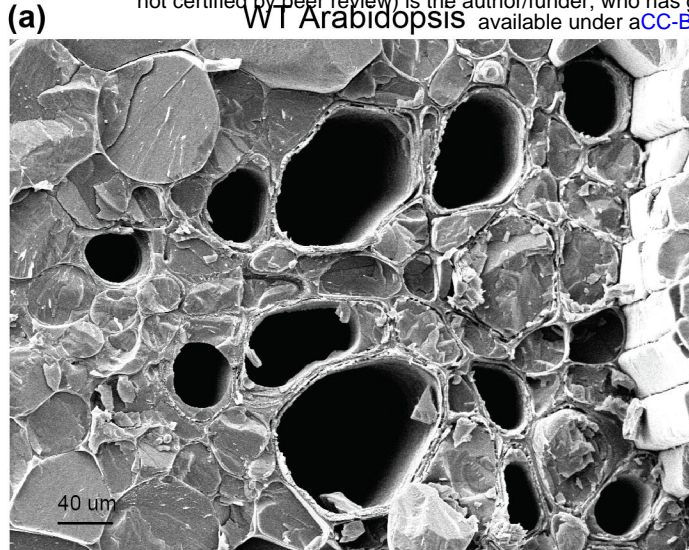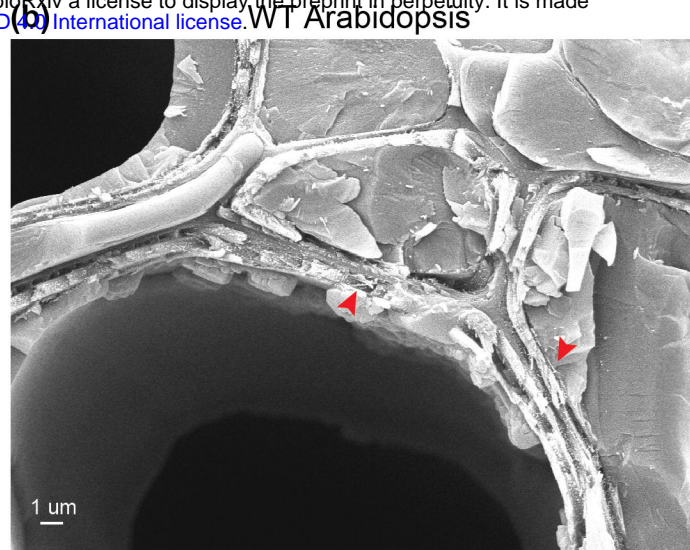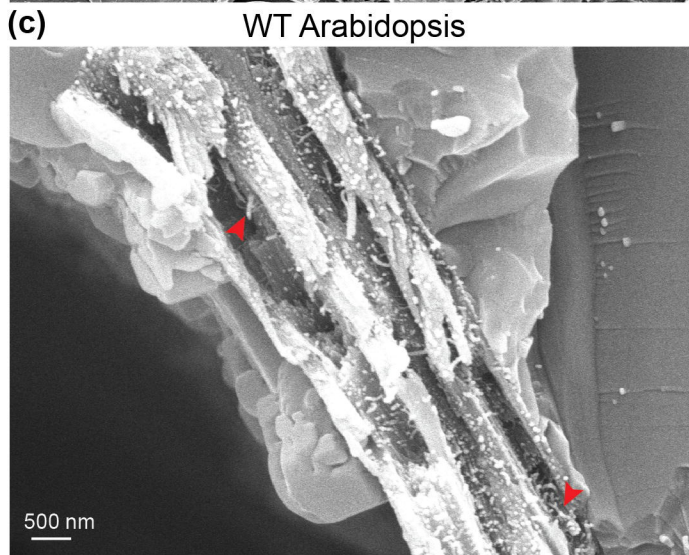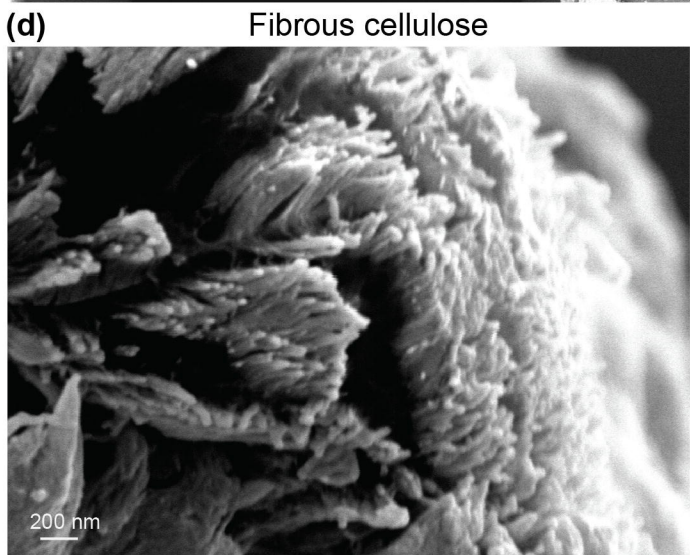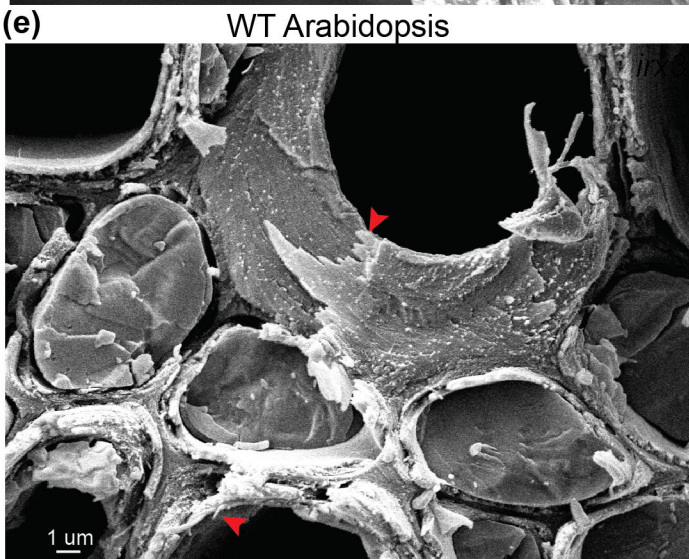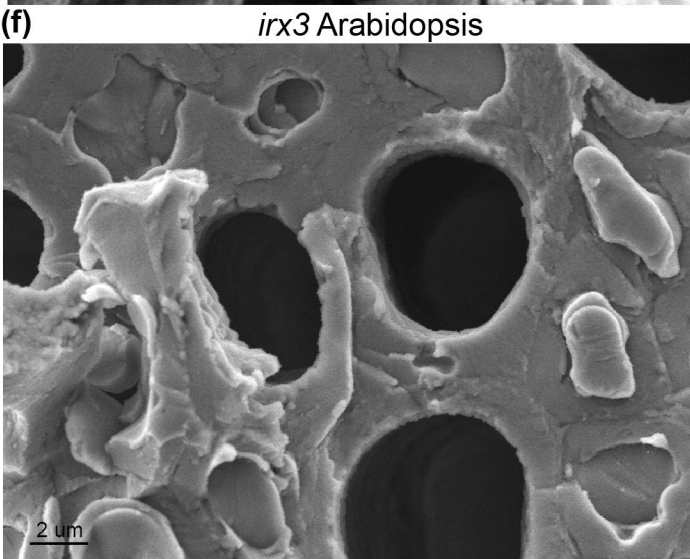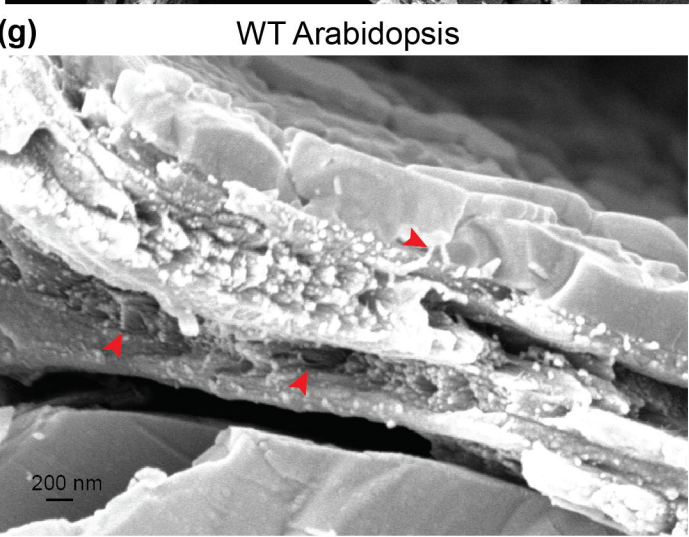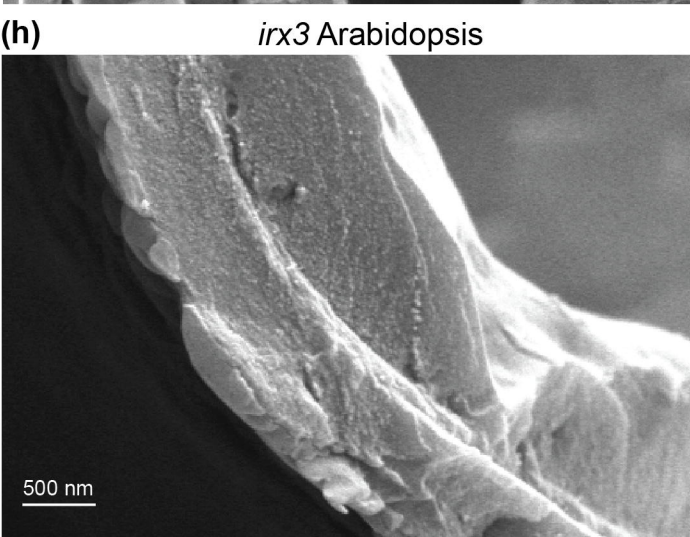

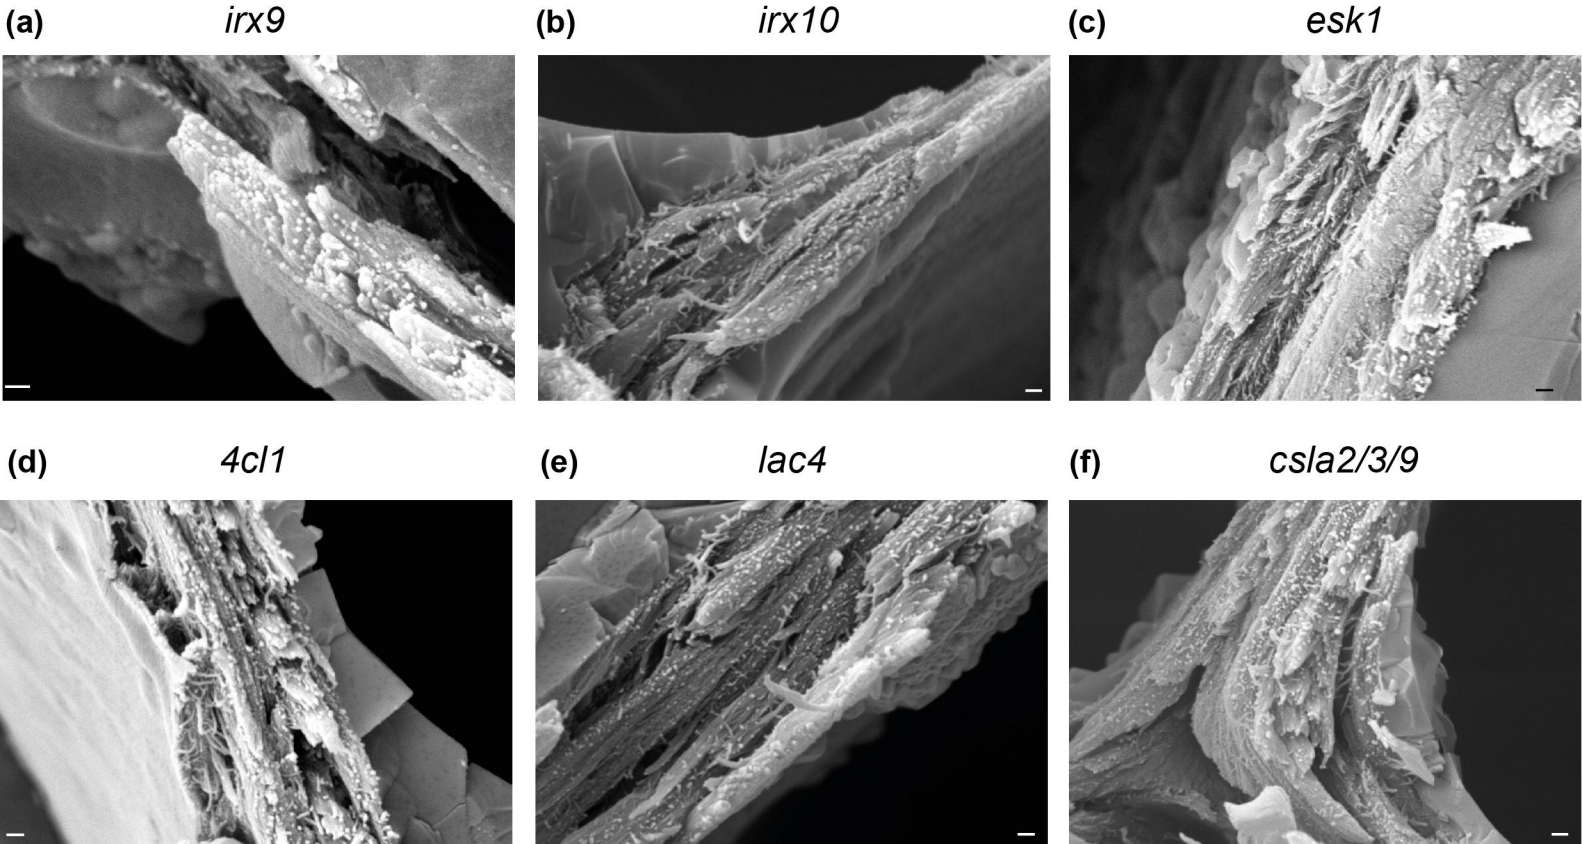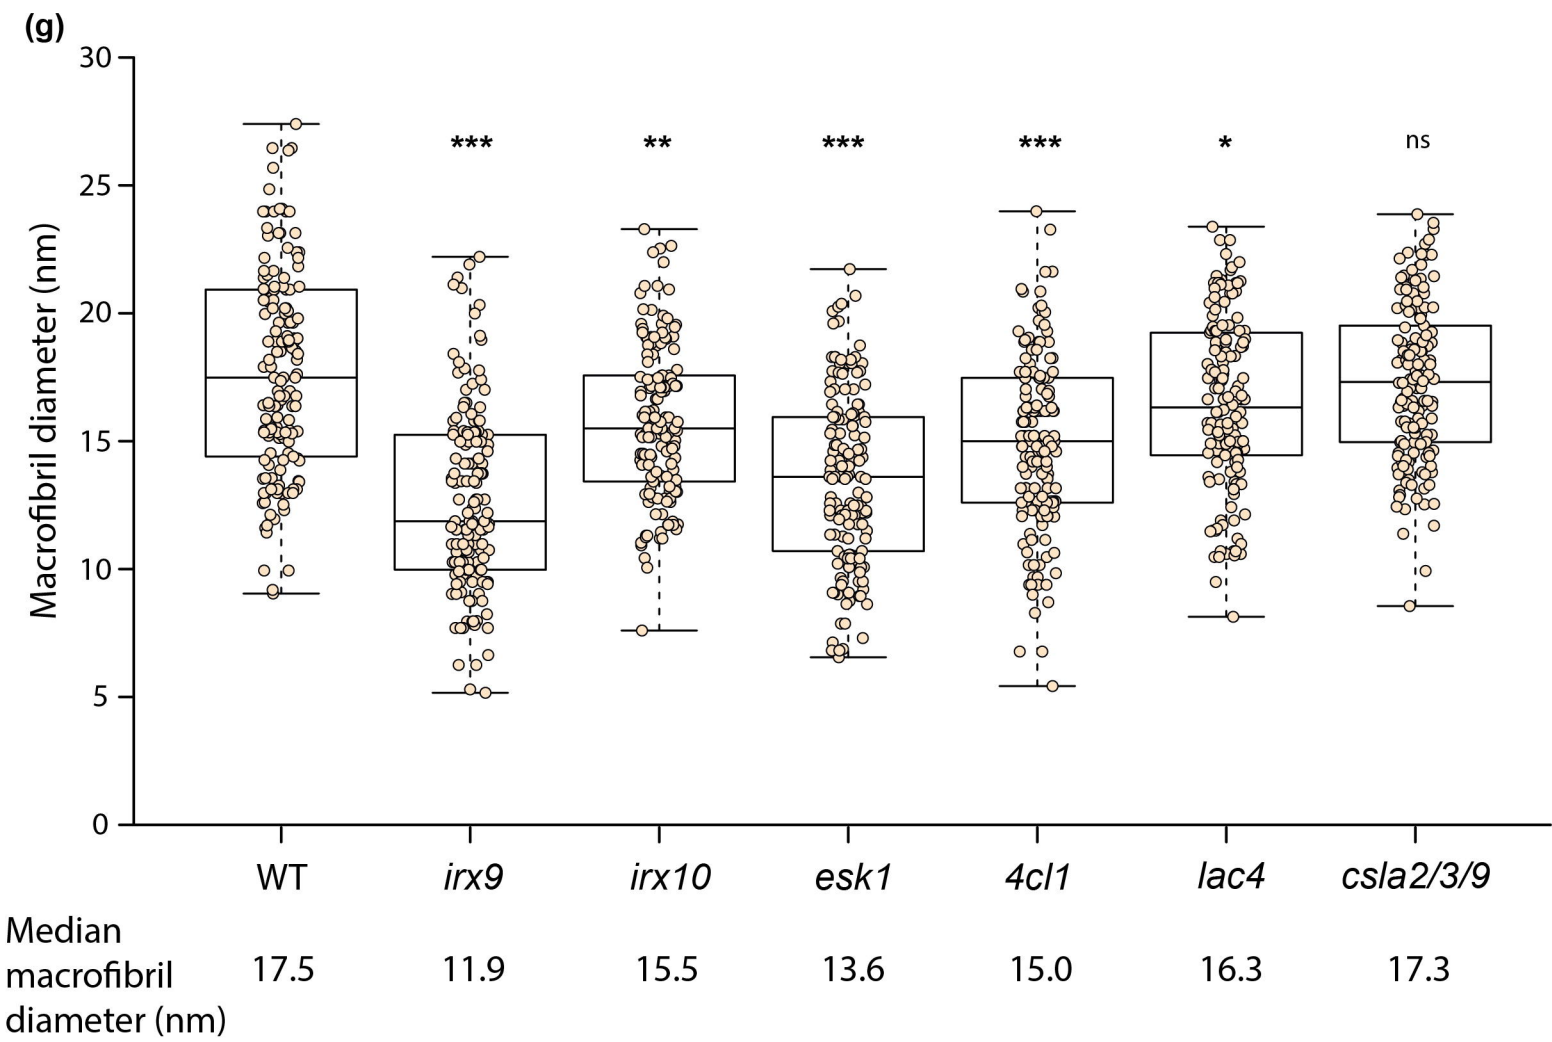

Source: https://www.biorxiv.org/content/10.1101/648360v1.full.pdf
